# Supplementary material
Source: HighWire-hosted journal article supplement (https://emj.bmj.com/content/36/3/171)
Supplement: inline-supplementary-material-2 [file inline-supplementary-material-2.pdf]

## 2.1 HANDHYGIEN

Mikrober sprids oftast genom kontakt via händerna. Inom hälso- och sjukvården, detta smittvägen kan brytas med god handhygien.

Ringar, hand eller konstgjorda smycken och akryl naglar bör inte användas, eftersom det är hinder för adekvat handhygien. Under dem samlas lätt smuts och fukt, vilket ger en fruktbar tillväxtmiljö för mikrober. Också användningen av nagellack är förbjuden.

| Metoder                           | Syfte                                                                                                           | Hur                                                                                                                                                                                              | När                                                                                                                                                                                                                                              |
|-----------------------------------|-----------------------------------------------------------------------------------------------------------------|--------------------------------------------------------------------------------------------------------------------------------------------------------------------------------------------------|--------------------------------------------------------------------------------------------------------------------------------------------------------------------------------------------------------------------------------------------------|
| Hand desinfektion                 | Tar bort och förstör den tillfälliga mikrob floran                                                              | Alkoholbaserad handdesinfektion lösning (3-5ml) gnuggas i helt torra händerna, speciellt fingertopparna och tummen, tills händerna är helt torra (ca 30 sekunder)<br><br>Handdesinfektion teknik | Före och efter kontakt med patienten eller patientnära arbete<br><br>Under behandlings händelsen enligt med aseptisk arbetsordning<br><br>Innan gång till och från behandlingsmiljön<br><br>Innan livsmedel behandling<br><br>Efter toalettbesök |
| Kirurgisk hand desinfektion       |                                                                                                                 |                                                                                                                                                                                                  |                                                                                                                                                                                                                                                  |
| Händerna sköljs (bara med vatten) | Tar bort möjligt kladdighet ur händerna som är orsak av användningen av alkoholbaserad handdesinfektion lösning | Händerna sköljdes med ljummet vatten (utan tvål)                                                                                                                                                 | Om det är nödvändigt                                                                                                                                                                                                                             |
| Händerna tvättas med tvål         | Rengör händerna av smuts och sekret                                                                             | Händerna tvättas med ljummet vatten och med tvål för 15-30 sekunder, sköljs och torkas med en slänghandduk                                                                                       | Om händerna är synligt smutsiga<br><br>Efter toalettbesök<br><br>Clostridium difficile och Noro virus isolering                                                                                                                                  |
| Skyddshandskar                    |                                                                                                                 |                                                                                                                                                                                                  |                                                                                                                                                                                                                                                  |

|                |                                                                                              |                                        |                                                   |
|----------------|----------------------------------------------------------------------------------------------|----------------------------------------|---------------------------------------------------|
| Hud behandling | Hud behandling håller huden på händerna i gott skick och bibehåller den normala fuktbalansen | Undvik u-nödig handtvätt med tvål      | Alltid                                            |
|                |                                                                                              | Använd alkoholbaserad handdesinfektion | Alltid                                            |
|                |                                                                                              | Använd handkräm                        | Efter att ha arbetat, vid behov under arbetsdagen |
|                |                                                                                              | Behandla hud sår och infektioner       | Alltid                                            |

### 2.1.1 NAGEL REGNHET OCH ATT UNDVIKA ANDVÄNDNINGEN AV HANDSMYCKEN

Nagelvård är en viktig del av handhygien, eftersom under och kring naglar är en stor del av händernas mikrober. Att hålla naglarna korta är viktigt och också eftersom skyddshandskarna är lättare att klä på. Från under nageln kan mikroberna röra till fingertoppar. Därför bör naglarna hållas rena.

Nedan en ring kan det vara så mycket som Europas befolkning av mikrober

Under nageln finns det Finlands befolkning av mikrober

I inflammation finns det världens befolkning av mikrober

Klockor, ringar och smycken förhindrar handhygien

Naglar måste hållas korta, konstgjorda naglar är förbjudna

Användning av nagellack är förbjudet

Användningen av nagellack är förbjuden. Konstgjorda naglar bör inte användas i sjukvård. Under dem samlas lätt fukt och smuts, vilket ger en grogrund för mikrober. Till och med de hindrar en effektiv handdesinfektion.

Användningen av fingerringar är förbjudet i sjukvården. Under de finns mera mikrober än på händernas hud och handeksem har ofta visat sig uppkomma från fukt eller tvål som ligger under fingerringarna. På samma sätt tillhör klockor och handssmycken inte till sjukvårdsarbete eftersom de gör det svårt att tvätta och desinfektera händerna

### 2.1.2 Desinfektionstekniker

I handdesinfektion bör man använda rätt handtvätt teknik och lämplig mängd av desinfektionsmedel eftersom desinfektion kan misslyckas. För desinfektion är det viktigt att alkohol baserat handdesinfektionsmedel användes tillräcklig mängd för åtminstone 3 till 5 ml (Två gånger för pumpen)

Desinfektion automater placeras på ett sådant sätt att handdesinfektion är lätt att utföra mellan patient kontakter.

Också patienter och besökare styrs för att följa handhygien. Handhygien guide för patienter och anhöriga, (Ordning Edita Prima Oy/HYG01)

1. Rubb fingertopparna mot handflatan
2. Gnid handflattorna mot varandra, fingrar interlockad
3. Rubb backhand sidorna växelvis
4. Rubb båda tummarna separat
5. Slutligen gnugga fingrarna böjda mot varandra

### 2.3. Skyddsutrustning

Skyddshandskar skall minskas antalet av mikrober i händerna såväl som risken för blossmitta. Skyddshandskar bör väljas med hänsyn till avsedd användningen.

Sterila skyddshandskar används i små behandlingsåtgärder som kräver sterilitet och vid tillverkning och hantering av steriliserande produkter.

Fabriks rena släng handskar används i behandlingsåtgärder, där användningen av skyddshandskar är nödvändigt.
