# Supplementary material
Source: HighWire-hosted journal article supplement (https://emj.bmj.com/content/36/3/171)
Supplement: inline-supplementary-material-3 [file inline-supplementary-material-3.docx]

Introduktion Sundhedsrelaterede infektioner forårsaget af utilstrækkelig hygiejne er forbundet med dødelighed, økonomisk byrde og lidelse for patienten. Personalet i ambulancetjenesten møder mange patienter i forskellige omgivelser og er således i fare for at udgøre en kilde til mikrobiel transmission. Håndhygiejne (HH), som infektionskontrolindsats, er sjældent blevet undersøgt i ambulancetjenesten. Metode Et prospektivt multicenter observationsstudie blev gennemført fra december 2016 til maj 2017 i ambulancetjenester fra Finland, Sverige, Australien og Danmark. To observatører registrerede følgende parametre: HH compliance i henhold til WHO's retningslinjer (før patientkontakt, før rene / aseptiske procedurer, efter risiko for kropsvæsker, efter patientkontakt og efter kontakt med patientomgivelser). Handske brug og basale parametre såsom negle, hår og anvendelse af smykker blev også registreret. Resultat 60 timers observation fandt sted i hvert land. I alt var der 87 patient forløb og 1344 indikationer for HH. Brug af håndsprit eller håndvask blev observeret: før patientkontakt 3%; før rene / aseptiske procedurer 2%; efter risiko for kropsvæsker 8%, efter patientkontakt 29% og efter kontakt med patientrelaterede omgivelser 38%. Handsker blev båret i 54% af alle HH-indikationer. Overholdelse af anbefalinger om kort eller opsat hår, korte, rene negle uden lak og ingen anvendelse af smykker var henholdsvis 99%, 84% og 62%. HH-compliance var relateret til brug af handsker (OR: 45; 95% CI: 10,8-187,8; p = 0,000) og professionsniveau (OR: 1,7; 95% CI: 1,1-2,4; p = 0,007), men ikke relateret til køn (OR: 1,3; 95% CI: 0,9-1,9; p = 0,107). Konklusion HH compliance blandt ambulancepersonalet var bemærkelsesværdigt lavt, og kendetegnet ved en bedre compliance efter patientkontakt sammenlignet med før patientkontakt, og et overforbrug af handsker. Vi anbefaler yderligere forskning i kontekstuelle udfordringer og hygiejneforståelse blandt ambulancepersonaler for at afklare fremtidige forbedringsstrategier.
